# Supplementary material for: Stenting in Brain Hemodynamic Injury of Carotid Origin Caused by Type A Aortic Dissection: Local Experience and Systematic Literature Review
Source: MDPI journal article supplement (doi:10.3390/jpm13010058), 2022-12-27
Supplement: s1 [file s1]

## **SUPPLEMENTAL MATERIAL :**

- Supplemental Table S1: Risk of bias of each case report study according to the The Joanna Briggs Institute Critical Appraisal tools.
- Supplemental Table S2: Risk of bias of each individual non-randomised study according to the Cochrane Collaboration tool.
- Supplemental Table S3A : Individual patients data from the patients treated by aortic and carotid surgery
- Supplemental Table S3B : Individual patients data from the patients treated by carotid stenting before aortic surgery
- Supplemental Table S3C : Individual patients data from the patients treated by carotid stenting after aortic surgery

Supplemental Table S1: Risk of bias of each case report study according to the The Joanna Briggs Institute Critical Appraisal tools.

[illegible]

| Supplemental Table S2: Risk of bias of each individual non-randomised study according to the Cochrane Collaboration tool. |    |   |   |    |   |   |    |   |         |
|---------------------------------------------------------------------------------------------------------------------------|----|---|---|----|---|---|----|---|---------|
| Study / Criterion                                                                                                         | 1  | 2 | 3 | 4  | 5 | 6 | 7  | 8 | Overall |
| Published as full papers                                                                                                  |    |   |   |    |   |   |    |   |         |
| Fichadaya et al. 2022                                                                                                     | /  | + | + | /  | + | + | ++ | / | Mild    |
| Morimoto et al. 2011                                                                                                      | ++ | + | + | ++ | + | + | +  | + | Low     |

#### **Criteria used**

1. Was selection of exposed and non-exposed cohorts drawn from the same population?
2. Can we be confident in the assessment of exposure?
3. Can we be confident that the outcome of interest was not present at start of study
4. Did the study match exposed and unexposed for all variables that are associated with the outcome of interest or did the statistical analysis adjust for these prognostic variables?"
5. Can we be confident in the assessment of the presence or absence of prognostic factors?
6. Can we be confident in the assessment of outcome?
7. Was the follow up of cohorts adequate?
8. Were co-Interventions similar between groups?

#### **Ratings**

Definitely yes (Low risk of bias) ++

Probably Yes +

Probably No -

Definitely No (High risk of Bias) --



|                        |   |    |    |    |   |    |     |     |    |     |    |    |    |    |    |         |
|------------------------|---|----|----|----|---|----|-----|-----|----|-----|----|----|----|----|----|---------|
| New lesion on imaging  | / | No | No | NA | / | No | Yes | Yes | NA | Yes | No | NA | NA | NA | NA | 23(56%) |
| mRS score after 24h    | / | 0  | NA | NA | / | NA | NA  | NA  | 0  | 0   | NA | NA | NA | NA | NA | NA      |
| mRS score at discharge | / | 0  | NA | 0  | / | 0  | 0   | 0   | 0  | 0   | 0  | 0  | 0  | 1  | NA | NA      |
| mRS score on follow-up | / | 1  | NA | NA | / | 0  | 0   | 0   | NA | NA  | NA | NA | NA | NA | NA | NA      |

Supplemental Table S3B : Individual patients data from the patients treated by carotid stenting before aortic surgery

| Article/Patient                           | Local center patient<br>1     | Local center patient<br>2             | Local center patient<br>3        | Local center patient<br>4     | Funakoshi et al.<br>Patient 1                                                | Funakoshi et al.<br>Patient 2           | Heran et al.                                                   | Popovic et al.                            |
|-------------------------------------------|-------------------------------|---------------------------------------|----------------------------------|-------------------------------|------------------------------------------------------------------------------|-----------------------------------------|----------------------------------------------------------------|-------------------------------------------|
| Demographics                              |                               |                                       |                                  |                               |                                                                              |                                         |                                                                |                                           |
| Age (y)                                   | 77                            | 71                                    | 72                               | 72                            | 63                                                                           | 57                                      | 73                                                             | 37                                        |
| Sex : Male(M) Female (F)                  | M                             | M                                     | M                                | M                             | F                                                                            | F                                       | M                                                              | M                                         |
| Arterial hypertension                     | Yes                           | No                                    | Yes                              | Yes                           | NA                                                                           | No                                      | NA                                                             | Yes                                       |
| Current smoking                           | No                            | No                                    | Yes                              | No                            | NA                                                                           | NA                                      | NA                                                             | Yes                                       |
| Pre-stroke mRS                            | 0                             | 0                                     | 0                                | 0                             | 0                                                                            | 0                                       | 0                                                              | 0                                         |
| Clinical                                  |                               |                                       |                                  |                               |                                                                              |                                         |                                                                |                                           |
| NIHSS                                     | 21                            | NA(left hemiplegia)                   | 10                               | 3                             | 24                                                                           | 18                                      | NA(left hemiparesis,<br>Hemilateral anopsia,<br>hemi- neglect) | 10                                        |
| Management                                |                               |                                       |                                  |                               |                                                                              |                                         |                                                                |                                           |
| Time from symptom onset<br>to angioplasty | 2h                            | 6h                                    | Day2(initial<br>monitoring only) | 18h                           | NA                                                                           | NA                                      | 5h                                                             | 3h                                        |
| Radiological                              |                               |                                       |                                  |                               |                                                                              |                                         |                                                                |                                           |
| ASPECTS Score                             | 7                             | 10                                    | 8                                | 9                             | 10                                                                           | 8                                       | 10                                                             | 10                                        |
| Dissected arteries                        | RCCA and ICA, LCCA<br>and ICA | RCCA and ICA                          | RCCA and ICA                     | RCCA                          | RCCA, LCCA, R<br>vertebral artery                                            | RCCA                                    | RCCA                                                           | RCCA                                      |
| Per-procedure<br>complications (CS)       | No                            | No                                    | No                               | No                            | No                                                                           | No                                      | No                                                             | No                                        |
| Aftermath                                 |                               |                                       |                                  |                               |                                                                              |                                         |                                                                |                                           |
| Deficit regression post CS                | Partial                       | Partial                               | Partial                          | No                            | Partial                                                                      | Partial (almost<br>complete regression) | Partial                                                        | NA                                        |
| New lesion on post CS<br>imaging          | No                            | NA                                    | No                               | Yes (single<br>ischemic spot) | Yes (small signal<br>hyperintensity areas<br>in the left cerebral<br>cortex) | No                                      | NA                                                             | NA                                        |
| Delay CS-Surgery                          | 2h                            | NA(death day2<br>mesenteric ischemia) | NA(previous Bentall<br>surgery)  | Same day                      | Same day                                                                     | 12days                                  | Immediate                                                      | 8h                                        |
| Survival<br>Yes/No                        | Yes                           | No                                    | Yes                              | Yes                           | Yes                                                                          | Yes                                     | Yes                                                            | No (death from<br>mediastinitis at day35) |
| New neurological deficit                  | No                            | /                                     | No                               | No                            | No                                                                           | No                                      | No                                                             | NA                                        |
| New lesion on post<br>surgery imaging     | No                            | /                                     | NA                               | No                            | NA                                                                           | NA                                      | NA                                                             | NA                                        |
| mRS score at discharge                    | 2                             | /                                     | 4                                | NA                            | NA                                                                           | NA                                      | 1                                                              | /                                         |
| mRS score on follow-up                    | 1                             | /                                     | 3                                | 1                             | 1                                                                            | 1                                       | 1                                                              | /                                         |
| Stent permeability on<br>follow-up        | Yes                           | /                                     | Yes                              | Yes                           | NA                                                                           | NA                                      | Yes                                                            | /                                         |

Supplemental Table S3C : Individual patients data from the patients treated by carotid stenting after aortic surgery

| Article/Patient                    | Local center patient<br>5                                                                                                    | Local center patient<br>6                                             | Local center patient<br>7                                          | Local center patient<br>8                                | Local center patient<br>9                                            | Roseborough et al.                                                   | Casana R<br>et al. |
|------------------------------------|------------------------------------------------------------------------------------------------------------------------------|-----------------------------------------------------------------------|--------------------------------------------------------------------|----------------------------------------------------------|----------------------------------------------------------------------|----------------------------------------------------------------------|--------------------|
| Demographics                       |                                                                                                                              |                                                                       |                                                                    |                                                          |                                                                      |                                                                      |                    |
| Age (y)                            | 78                                                                                                                           | 64                                                                    | 71                                                                 | 74                                                       | 62                                                                   | 66                                                                   | 66                 |
| Sex : Male(M) Female (F)           | F                                                                                                                            | M                                                                     | F                                                                  | F                                                        | F                                                                    | M                                                                    | F                  |
| Arterial hypertension              | Yes                                                                                                                          | Yes                                                                   | Yes                                                                | No                                                       | Yes                                                                  | NA                                                                   | No                 |
| Current smoking                    | No                                                                                                                           | Yes                                                                   | No                                                                 | No                                                       | Yes                                                                  | NA                                                                   | NA                 |
| Pre-stroke mRS                     | 0                                                                                                                            | 0                                                                     | 0                                                                  | 0                                                        | 0                                                                    | 0                                                                    | 0                  |
| Clinical                           |                                                                                                                              |                                                                       |                                                                    |                                                          |                                                                      |                                                                      |                    |
| NIHSS                              | NA(left hemiplegia,<br>Glasgow 8)                                                                                            | 0                                                                     | 0                                                                  | 0                                                        | 0                                                                    | 0                                                                    | 0                  |
| Management                         |                                                                                                                              |                                                                       |                                                                    |                                                          |                                                                      |                                                                      |                    |
| Time from symptom onset to surgery | 6h                                                                                                                           | 6h                                                                    | 6h                                                                 | 4h                                                       | 8h                                                                   | 2days                                                                | NA                 |
| Radiological                       |                                                                                                                              |                                                                       |                                                                    |                                                          |                                                                      |                                                                      |                    |
| ASPECTS Score (initial)            | 10                                                                                                                           | 10                                                                    | NA                                                                 | NA                                                       | NA                                                                   | NA                                                                   | 10                 |
| Dissected arteries                 | RCCA                                                                                                                         | LCCA                                                                  | RCCA                                                               | RCCA and ICA, LCCA                                       | RCCA                                                                 | LCCA and ICA                                                         | RCCA and ICA, LCCA |
| Surgery aftermath                  |                                                                                                                              |                                                                       |                                                                    |                                                          |                                                                      |                                                                      |                    |
| New neurological deficit           | Yes (anisocoria and left hemiplegia)                                                                                         | Yes (ataxia and left arm paresis)                                     | Yes (Tonic-clonic seizure)                                         | Yes(confusion)                                           | Yes (left hemiplegia and heminegligence)                             | Yes (Absence of movements of left side)                              | Yes (drop attacks) |
| New lesion on post-op imaging      | Yes (complete right anterior and sylvian stroke)                                                                             | Yes (right junctional ischemic lesions and hemispheric hypoperfusion) | Yes (bilateral watershed infarcts, right hemisphere hypoperfusion) | No (isolated right hemisphere hypoperfusion)             | Yes (right junctional ischemic lesions and hemisphere hypoperfusion) | Yes (right small watershed infarcts, right hemisphere hypoperfusion) | No                 |
| Delay Surgery-CS                   | 1day                                                                                                                         | 1day                                                                  | 4h                                                                 | 14days                                                   | 3days                                                                | 4days                                                                | 30days             |
| Stenting aftermath                 |                                                                                                                              |                                                                       |                                                                    |                                                          |                                                                      |                                                                      |                    |
| Per-procedure complications (CS)   | Yes(common carotid intra-stent thrombosis treated by immediate aspiration, A2 distal emboli treated by immediate aspiration) | No                                                                    | No                                                                 | Yes (right sylvian M2 embolism, treated by thrombectomy) | Yes (distal emboli)                                                  | No                                                                   | No                 |
| Deficit regression post CS         | No                                                                                                                           | Partial                                                               | Partial                                                            | No                                                       | No                                                                   | Partial                                                              | Partial            |
| New neurological deficit           | No                                                                                                                           | Yes (transient majoration due to reperfusion oedema)                  | No                                                                 | No                                                       | No                                                                   | No                                                                   | No                 |
| New lesion on post CS imaging      | No                                                                                                                           | No                                                                    | NA                                                                 | Yes (small right watershed infarcts)                     | Yes (diffuse ischemic lesions)                                       | No                                                                   | NA                 |
| Survival Yes/No                    | No (Neurologic degradation day8)                                                                                             | Yes                                                                   | Yes                                                                | No (cardio-respiratory arrest day4)                      | Too early                                                            | Yes                                                                  | Yes                |
| mRS score at discharge             | NA                                                                                                                           | 1                                                                     | 4                                                                  | NA                                                       | Too early                                                            | 2                                                                    | NA                 |
| mRS score on follow-up             | NA                                                                                                                           | 1                                                                     | 1                                                                  | NA                                                       | Too early                                                            | 0                                                                    | NA                 |

|                                 |     |     |     |     |           |     |     |
|---------------------------------|-----|-----|-----|-----|-----------|-----|-----|
| Stent permeability on follow-up | Yes | Yes | Yes | Yes | Too early | Yes | Yes |
|---------------------------------|-----|-----|-----|-----|-----------|-----|-----|
